# Supplementary material for: Development and validation of an HPLC-DAD method for the quantification of cannabigerol, cannabidiol, cannabinol and cannabichromene in human plasma and mouse matrices
Source: Royal Society of Chemistry journal article supplement (doi:10.1039/d4an00070f), 2024-01-01
Supplement: d4an00070f3.pdf [file d4an00070f3.pdf]

### Supplementary figure captions

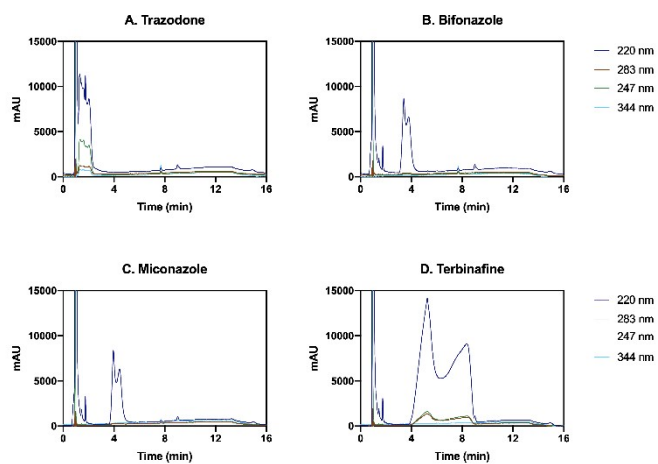

**Supplementary Fig 1.** Chromatograms of the tested compounds, trazodone (A), bifonazole (B), miconazole (C) and terbinafine (D) that interfere with the analytical technique.
