# Supplementary figures and images for: Development and validation of an HPLC-DAD method for the quantification of cannabigerol, cannabidiol, cannabinol and cannabichromene in human plasma and mouse matrices
Source: Royal Society of Chemistry journal article supplement (doi:10.1039/d4an00070f), 2024-01-01

**A. Trazodone**

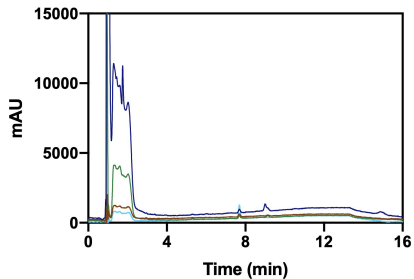

**B. Bifonazole**

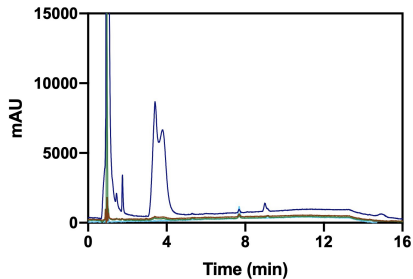

— 220 nm  
— 283 nm  
— 247 nm  
— 344 nm

**C. Miconazole**

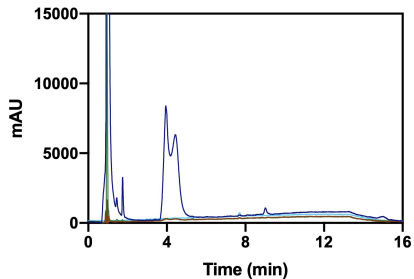

**D. Terbinafine**

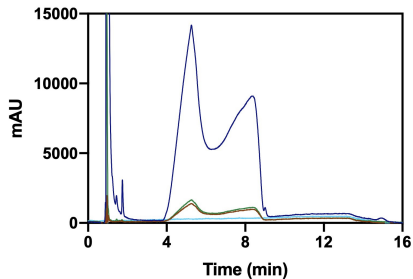

— 220 nm  
— 283 nm  
— 247 nm  
— 344 nm

Supplement: d4an00070f2.pdf [file d4an00070f2.pdf]
